# Supplementary material for: BNIP3-Dependent Mitophagy via PGC1α Promotes Cartilage Degradation
Source: MDPI journal article supplement (doi:10.3390/cells10071839), 2021-07-20
Supplement: s1 [file s1]

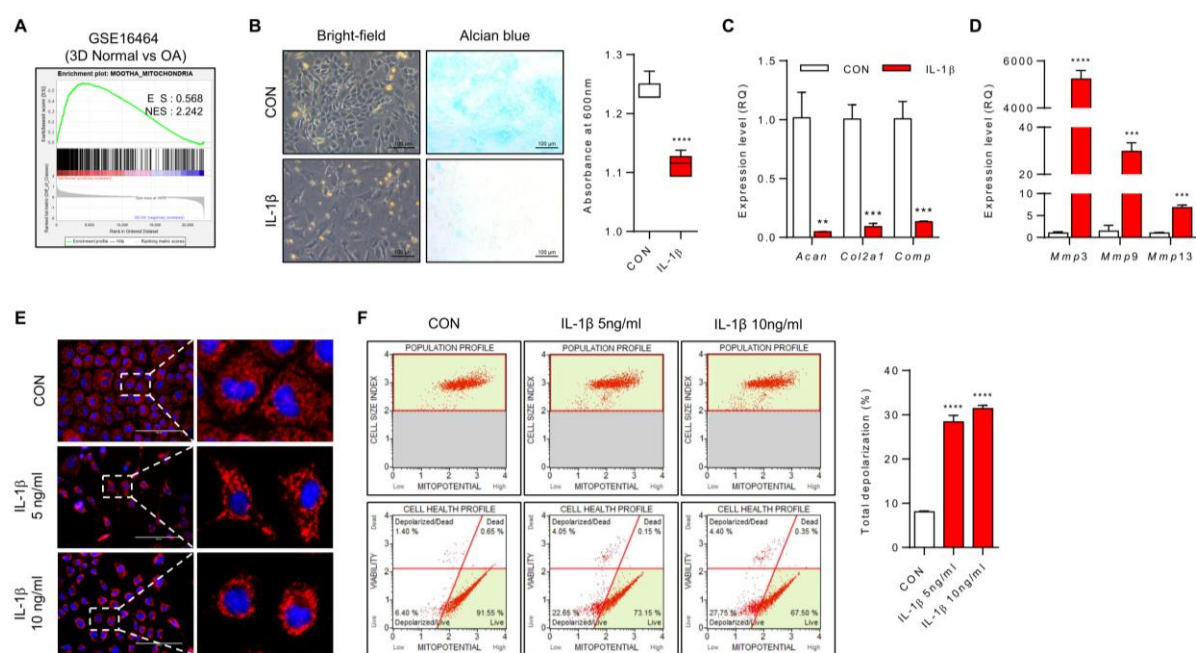

**Supplementary Figure S1.** Mitochondria dysfunction during OA pathogenesis. **(A)** Gene set enrichment analysis (GSEA) of GSE16464 (3D culture of normal vs. OA chondrocyte). **(B)** iMACs were treated with IL-1 $\beta$  and stained with Alcian blue. Alcian blue staining extracted with 6M guanidine-HCl was measured in 600nm absorbance (n = 4). **(C)** Transcription level of *Acan*, *Col2a1*, and *Comp* were analyzed using qRT-PCR (n = 3). **(D)** Transcription level of *Mmp3*, *Mmp9*, and *Mmp13* were analyzed using qRT-PCR (n = 3). **(E)** Representative images of MitoTracker with IL-1 $\beta$ -treated iMACs (n = 5; Scale bars, 20 $\mu$ m). **(F)** Mitochondria membrane potential level was analyzed using MUSE Cell Analyzer (n = 3). Values were expressed as means+s.d. An unpaired *t*-test or one-way ANOVA were used for statistical analysis. \*\*\*P<0.001, \*\*\*\*P<0.0001.

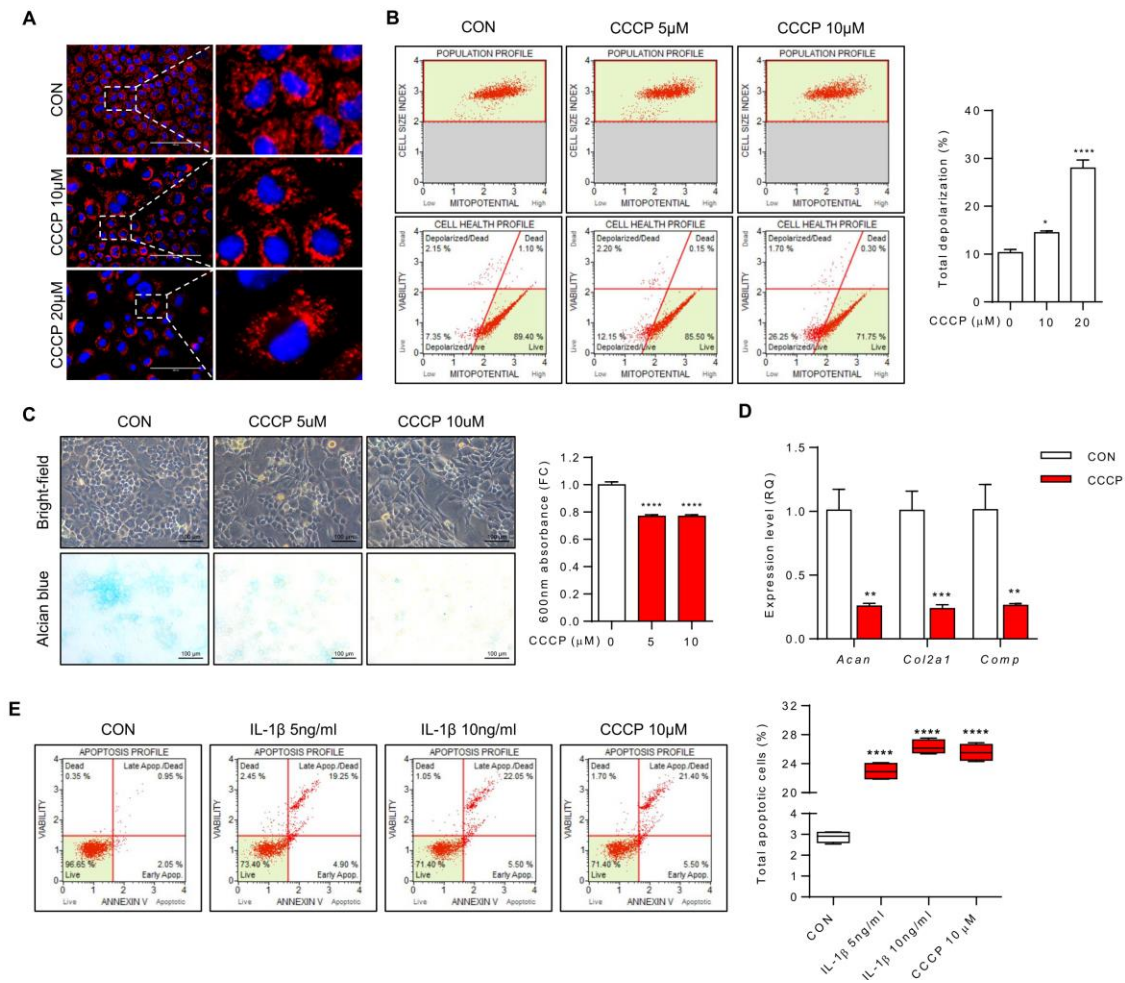

**Supplementary Figure S2.** Mitochondria dysfunction dysregulates the homeostasis of cartilage matrix. **(A)** iMACs were treated with carbonyl cyanide 3-chlorophenylhydrazone (CCCP) and stained with MitoTracker (n = 5; Scale bars, 20 $\mu$ m). **(B)** Mitochondria membrane potential level was analyzed using MUSE Cell Analyzer (n = 3). **(C)** Representative images of Alcian blue with CCCP-treated iMACs (Scale bars, 100 $\mu$ m). Alcian blue staining extracted with 6M guanidine-HCl was measured in 600nm absorbance (n = 4). **(D)** Transcription level of *Acan*, *Col2a1*, and *Comp* were analyzed using qRT-PCR (n = 3). **(E)** Apoptotic cell death was analyzed using MUSE Cell Analyzer (n = 3). Values were expressed as means + s.d. An unpaired *t*-test or one-way ANOVA were used for statistical analysis. \**P*  $\leq$  0.05, \*\*\**P* < 0.001, \*\*\*\**P* < 0.0001.

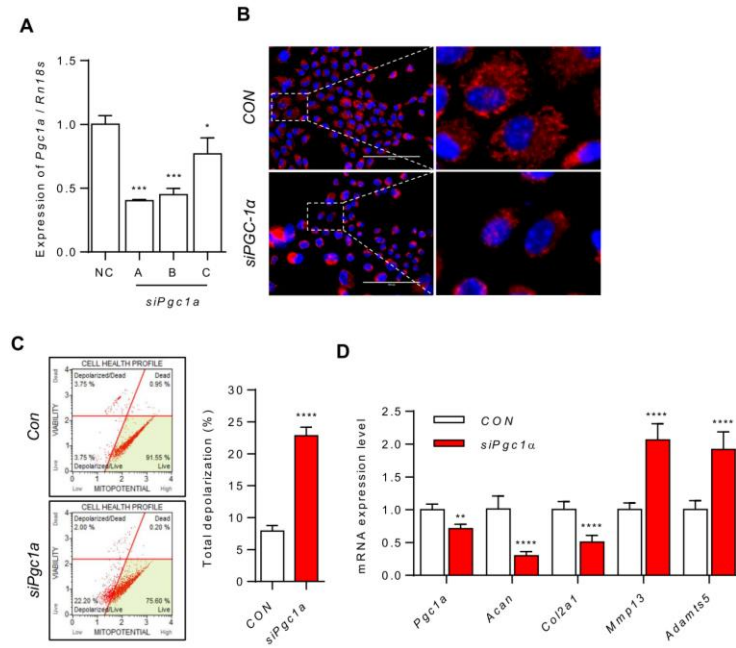

**Supplementary Figure S3.** Mitochondria dysfunction dysregulates the homeostasis of cartilage matrix. **(A)** Efficiency of three different *siPgcl1a* (A, B, C) was confirmed by real-time PCR using iMACs. **(B)** Representative images of MitoTracker with introduction of *siPgcl1a* into iMACs (n = 5; Scheme 100. m). **(C)** Mitochondria membrane potential level was analyzed using MUSE Cell Analyzer (n = 3). **(D)** Transcription level of *Pgcl1a*, *Acan*, *Col2a1*, *Mmp13* and *Adamts5* were analyzed using qRT-PCR (n = 3). Values were expressed as means + s.d. An unpaired *t*-test or one-way ANOVA were used for statistical analysis. \**P* ≤ 0.05, \*\*\**P* < 0.001, \*\*\*\**P* < 0.0001.

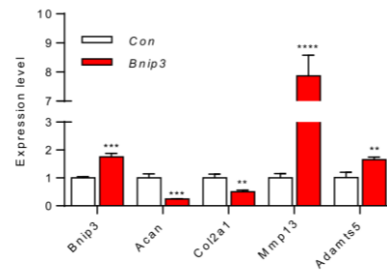

**Supplementary Figure S4.** Transcription level of *Bnip3*, *Acan*, *Col2a1*, *Mmp13* and *Adamts5* with introduction of *Bnip3* into iMACs were analyzed using qRT-PCR (n = 3).

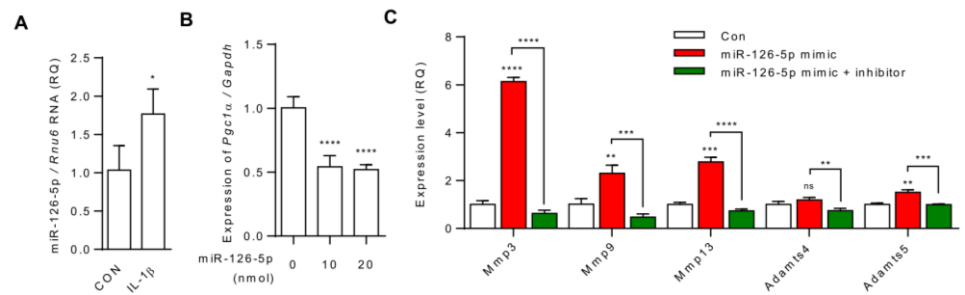

**Supplementary Figure S5.** The involvement of miR-126-5p in the pathogenesis of OA. **(A)** The expression level of miR-126-5p in iMACs treated with IL-1 $\beta$ . **(B)** The expression level of *Pgc1 $\alpha$*  in iMACs treated with miR-126-5p. **(C)** Transcription level of *Mmp3*, *Mmp9*, *Mmp13*, *Adamts4*, and *Adamts5* in iMACs treated with miR-126-5p mimic or miR-126-5p inhibitor were analyzed using qRT-PCR (n = 3). Values were expressed as means + s.d. An unpaired *t*-test or one-way ANOVA were used for statistical analysis. \**P*  $\leq$  0.05, \*\*\**P* < 0.001, \*\*\*\**P* < 0.0001.

Supple.

## #Western blot uncropped image

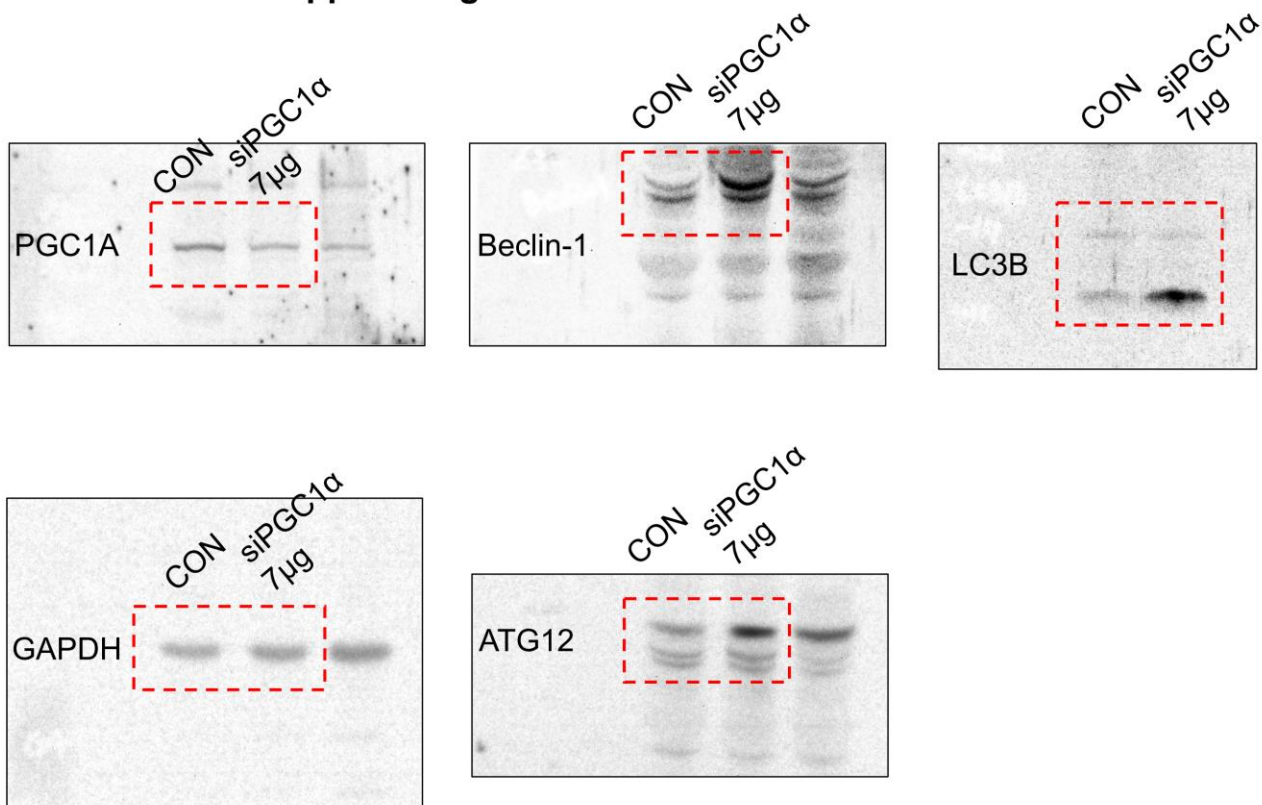

# #Western blot uncropped image

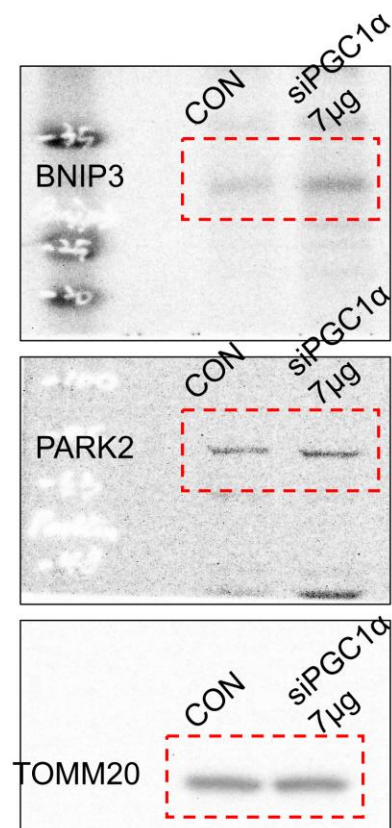

Supplementary Table S1. The primers used in this study

| Gene name           | Forward (5' → 3')       | Reverse (5' → 3')       |
|---------------------|-------------------------|-------------------------|
| Human <i>PGC1A</i>  | TGAACTGAGGGACAGTGATTTC  | CCCAAGGGTAGCTCAGTTTATC  |
| Human <i>RN18S</i>  | CTGAGAAACGGCTACCACATC   | GCCTCGAAAGAGTCCTGTATTG  |
| Mouse <i>Pgc1a</i>  | CTAGCCATGGATGGCCTATTT   | GTCTCGACACGGAGAGTTAAAG  |
| Mouse <i>Fndc5</i>  | GAGGTGACCATGAAGGAGATG   | GCGGCAGAAGAGAGCTATAA    |
| Mouse <i>Nrf2</i>   | CTCCGTGGAGTCTTCCATTTAC  | GCACTATCTAGCTCCTCCATTTT |
| Mouse <i>Ucp2</i>   | CCAGCCTACAGATGTGGTAAAG  | TCGACAGTGCTCTGGTATCT    |
| Mouse <i>Vegfb</i>  | CATGGGCAATGTGGTCAAAC    | AGGATCTGCATTCCGACTTG    |
| Mouse <i>Bnip3</i>  | TCCAGCCTCCGTCTCTATTT    | CTGTCACAGTGAGAACTCTTGG  |
| Mouse <i>Pink1</i>  | GTGGAATATCTCGGCAGGTT    | CTCCATACTCTCCAGCCAAAG   |
| Mouse <i>Prkn</i>   | CCTTCTGCCGGGAATGTAAA    | GGCTCTTTCATCGACTCTGTAG  |
| Mouse <i>Acan</i>   | GAGACTTCTGCCTCTGGAATAG  | CTCCAGAAGGAATCCCACTAAC  |
| Mouse <i>Col2a1</i> | CTGGTTTGGAGAGACCATGAA   | GAGGAAAGTCATCTGGACGTTAG |
| Mouse <i>Comp</i>   | CGTGGGCTGGAAGGATAAA     | TACTAGCTCAGGACCCTCATAG  |
| Mouse <i>Mmp3</i>   | GGACCAGGGATTAATGGAGATG  | TGAGCAGCAACCAGGAATAG    |
| Mouse <i>Mmp9</i>   | TCTGTATGGTCGTGGCTCTAA   | GGAGGTATAGTGGGACACATAGT |
| Mouse <i>Mmp13</i>  | CCCTGATGTTTCCCATCTATACC | TTCATCGCCTGGACCATAAAG   |
| Mouse <i>Adams5</i> | TGCCACAGACCCAACTAAAG    | CCATGGCTGATGACAGAGTT    |
| Mouse <i>Rn18s</i>  | CTGAGAAACGGCTACCACATC   | GCCTCGAAAGAGTCCTGTATTG  |
